# Supplementary material
Source: PubMed Central journal article supplement (PMC6247917)
Supplement: NIHMS991906-supplement-1.pdf [file NIHMS991906-supplement-1.pdf]

**Table S1. Predicted probability and 95% confidence interval of anti-HBc positive test results by time interval from IVIG administration until subsequent anti-HBc testing**

| Weeks after IVIG administration | Days after IVIG administration | Predicted probability anti-HBc positive |        |     | Number of anti-HBc tests conducted during each time interval* |
|---------------------------------|--------------------------------|-----------------------------------------|--------|-----|---------------------------------------------------------------|
|                                 |                                | Point estimate                          | 95% CI |     |                                                               |
| 1                               | 7                              | .34                                     | .22    | .48 | 36                                                            |
| 2                               | 14                             | .21                                     | .13    | .30 | 13                                                            |
| 3                               | 21                             | .15                                     | .10    | .22 | 10                                                            |
| 4                               | 28                             | .12                                     | .07    | .18 | 10                                                            |
| 5                               | 35                             | .10                                     | .06    | .15 | 4                                                             |
| 6                               | 42                             | .08                                     | .05    | .13 | 6                                                             |
| 7                               | 49                             | .07                                     | .04    | .11 | 12                                                            |
| 8                               | 56                             | .06                                     | .04    | .10 | 6                                                             |
| 12                              | 84                             | .04                                     | .02    | .07 | 33                                                            |
| 16                              | 112                            | .03                                     | .02    | .06 | 32                                                            |
| 20                              | 140                            | .03                                     | .01    | .05 | 13                                                            |
| 24                              | 168                            | .02                                     | .01    | .04 | 21                                                            |
| 28                              | 196                            | .02                                     | .01    | .04 | 11                                                            |
| 32                              | 224                            | .02                                     | .01    | .03 | 12                                                            |
| 36                              | 252                            | .01                                     | .01    | .03 | 12                                                            |
| 40                              | 280                            | .01                                     | .01    | .03 | 9                                                             |
| 44                              | 308                            | .01                                     | .01    | .03 | 12                                                            |
| 48                              | 336                            | .01                                     | .01    | .03 | 11                                                            |
| 52                              | 364                            | .01                                     | .00    | .02 | 3                                                             |

NOTE: anti-HBc: hepatitis B core antibody. IVIG: intravenous immunoglobulin.

CI: confidence interval.

\* There were 1 – 9 tests per study participant for 361 tests total. Results presented are truncated at 365 days and include 266 tests for 171 participants.
